# Supplementary material for: Long-term macrobioerosion in the Mediterranean Sea assessed by micro-computed tomography
Source: Copernicus journal article supplement (doi:10.5194/bg-13-3461-2016), 2016-06-15
Supplement: Supplementary file 1 [file bg-13-3461-2016-supplement.zip]

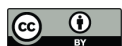

## *Supplement of*

# **Long-term macrobioerosion in the Mediterranean Sea assessed by micro-computed tomography**

**Claudia Färber et al.**

*Correspondence to:* Claudia Färber ([claudia.farber@senckenberg.de](mailto:claudia.farber@senckenberg.de))

- [bg-13-3461-2016-supplement-title-page.pdf](#)
- [Supplement\\_Färber et al](#)
  - [S1.xlsx](#)
  - [S2.xlsx](#)

The copyright of individual parts of the supplement might differ from the CC-BY 3.0 licence.
