# Supplementary material for: Long-term macrobioerosion in the Mediterranean Sea assessed by micro-computed tomography
Source: Copernicus journal article supplement (doi:10.5194/bg-13-3461-2016), 2016-06-15
Supplement: Supplementary file 1 [file S1.xlsx]

## Sheet: Sponge spicules
Identified Sponge		Tylostyles		Spirasters a		Spirasters b		Spirasters c
		Length (µm)	Width (µm)	Length (µm)	Width (µm)	Length (µm)	Width (µm)	Length (µm)	Width (µm)
Cliona schmidtii	Fig. 6A	196.16	5.055	67	2	35	3	17	3
		199.542	5.314	57	2	31	2
		198.762	3.139	67	2	28	3
		194.648	6.022	71	2	34	2
		207.138	4.753	69	3	52	3
		198.549	4.266
		203.395	4.812
		193.614	5.723
		197.652	5.109
		203.144	5.712
		246.88	5.448
		206.25	5.14
		198.426	4.516
		189.936	6.283
		177.39	5.035
		170.189	4.281
		199.308	4.078
		195.437	5.34
		194.157	8.033
		197.286	4.812
Cliona schmidtii	Fig. 6B	275.086	6.023	84	2	25	2	21	7
		261.551	5.813	58	2	34	2
		260.415	5.369	78	2	30	2
		230.679	5.369	73	1	39	2
		229.515	5.132	80	1	46	2
		226.869	5.083
		223.965	4.985
		222.95	4.985
		220.889	4.985
		214.958	4.909
		211.066	4.596
		209.715	4.596
		208.31	4.514
		208.024	4.019
		207.959	3.988
		207.864	3.988
		206.879	3.893
		205.302	3.796
		199.403	3.525
		179.067	3.344
Cliona cf. celata 1	Fig. 6C	373.425	13.143
		359.266	11.454
		351.245	11.437
		346.251	11.283
		344.161	11.232
		341.287	11.093
		339.399	10.61
		339.062	10.444
		332.704	10.369
		331.34	10.369
		325.713	10.065
		318.81	10.046
		317.203	9.988
		311.027	9.851
		301.848	9.851
		299.552	9.851
		290.031	9.53
		286.226	9.345
		260.237	5.911
		242.98	5.878
Cliona cf. celata 2	Fig. 6D	369.236	7.609
		364.144	7.477
		352.427	7.449
		346.543	7.41
		343.283	6.74
		338.841	6.74
		337.101	6.246
		330.771	6.188
		329.001	6.002
		327.609	5.911
		326.816	5.813
		319.422	5.694
		312.17	5.683
		306.933	5.657
		303.649	5.608
		299.639	5.608
		292.893	5.392
		270.256	4.874
		225.815	4.703
		217.664	4.11
Cliona cf. celata 2	Fig. 6E	338.707	8.605
		336.897	7.738
		336.796	7.738
		333.38	7.137
		330.744	6.688
		321.5	6.499
		309.805	6.499
		299.302	6.48
		299.073	6.305
		296.494	6.246
		296.224	5.483
		293.309	5.483
		291.849	5.392
		246.8	4.935
		246.363	4.729
		231.513	4.596
		219.931	4.486
		218.91	4.23
		211.191	3.595
		208.179	3.344
Cliona cf. celata 2	Fig. 6F	358.311	8.507
		350.824	8.507
		350.701	7.737
		348.793	7.737
		346.617	7.558
		340.994	7.131
		336.892	7.076
		335.852	6.993
		333.754	6.909
		333.164	6.909
		332.16	6.88
		331.896	6.765
		331.002	6.649
		321.844	6.44
		312.321	6.379
		310.998	6.255
		305.179	6.192
		252.866	5.767
		249.696	5.629
		235.326	5.158
Cliona cf. viridis	Fig. 6G	356.015	5.813	32	1
		308.458	5.299	20	1
		302.647	5.204
		300.713	4.985
		299.704	4.985
		299.081	4.935
		294.446	4.702
		290.918	4.486
		289.942	4.019
		269.282	4.019
		269.033	4.019
		266.83	4.019
		265.461	3.796
		249.841	3.629
		249.035	3.594
		248.572	3.525
		244.302	3.153
		228.698	3.153
		217.585	2.684
		216.7	2.542
Cliona cf. viridis	Fig. 6H	393.583	8.758	44	2	18	1
		377.935	8.338	32	1
		360.464	8.02	36	1
		356.179	7.979	30	1
		351.309	7.814	32	1
		348.337	7.588
		341.092	7.13
		340.698	6.992
		340.676	6.93
		339.978	6.787
		336.112	6.526
		334.187	6.492
		312.883	6.271
		310.208	6.131
		309.536	6.078
		302.453	5.969
		295.155	5.632
		260.719	5.456
		237.411	4.955
		234.486	4.195
Cliona rhodensis	Fig. 6I	356.292	10.48	23	1
		345.352	9.793
		326.672	9.523
		313.393	9.096
		311.263	8.986
		303.78	8.705
		302.664	8.605
		301.182	8.474
		290.29	8.053
		288.759	7.802
		286.044	7.592
		285.626	7.189
		270.794	7.137
		267.418	7.049
		267.099	6.979
		264.72	6.943
		250.783	6.925
		249.037	6.499
		246.016	6.48
		244.711	6.246
