# Supplementary material for: Long-term macrobioerosion in the Mediterranean Sea assessed by micro-computed tomography
Source: Copernicus journal article supplement (doi:10.5194/bg-13-3461-2016), 2016-06-15
Supplement: Supplementary file 2 [file S2.xlsx]

## Sheet: Quantification Bioerosion
Exposure (years)	Block	Volume Marble (mm3)	Volume Bioerosion (mm3)	Volume Microborings (mm3)	Volume unassignable Macroborings (mm3)	Volume Sponge Borings (mm3)	Volume Worm Borings (mm3)	Surface Marble Block (mm2)	Bioerosion Rates (g m-2 yr-1)
1	Fig. 2A	147892	8.98982	5.92787	3.06195	0	0	8195.1	2.96
1	Fig. 2B	139206	12.361	10.916	1.44495	0	0	7783.3	4.29
2	Fig. 2C	160191	1399.1	14.36	118.27	1266.47	0	8443.3	223.7
3	Fig. 2D	147352	780.632	16.1465	13.31	751.178	0	8245.4	85.21
4	Fig. 2E	152551	102.594	13.5823	89.0119	0	0	8533.53	8.12
4	Fig. 2F	144569	18.6128	12.0702	6.5426	0	0	8202.6	1.53
5	Fig. 3A	135287	5827.76	21.7415	87.94	5711.59	6.48787	8611.49	365.44
6	Fig. 3B	138384	5719.56	31.2251	112.68	5575.66	0	8352.8	308.14
7	Fig. 4A	144972	1133.49	9.11287	85.53	1038.85	0	8234.1	53.1
7	Fig. 4B	139241	7111.6	18.7959	191.1	6901.71	0	8259	332.13
7	Fig. 4C	136287	13599.9	37.964	184.32	13377.7	0	8095.5	647.98
8	Fig. 5A	130851	11746.9	121.038	255.2	11370.7	0	8307.2	477.25
8-9	Fig. 5B	142975	1640.6	16.9824	92.09	1531.52	0	8372.2	62.25
14	Fig. 5C	93275.4	40008.3	28.01	35.49	39896.3	48.508	8569.5	900.39
